# Supplementary material for: Bacterial adhesion and erythrocyte integrity on polycaprolactone nanowire surfaces
Source: Royal Society of Chemistry journal article supplement (doi:10.1039/d5ra05152e), 2025-01-01
Supplement: d5ra05152e1.pdf [file d5ra05152e1.pdf]

**Supplementary Information**

**Bacterial Adhesion and Erythrocyte Integrity on  
Polycaprolactone Nanowire Surfaces**

*Vignesh Sathyanarayanan,<sup>ab</sup> Liszt Y.C. Madruga,<sup>b</sup> Bruno Leandro Pereira,<sup>c</sup>*

*Paulo Soares,<sup>c</sup> and Ketul C. Papat <sup>\*ab</sup>*

*a. Department of Mechanical Engineering, Colorado State University, Fort Collins,  
CO 80523, USA.*

*b. Department of Bioengineering, George Mason University, Fairfax, VA 22030,  
USA.*

*c. Department of Mechanical Engineering, Pontificia Universidade Católica do  
Paraná, Curitiba 80215-901, PR, Brazil.*

*\* Corresponding Address: [kpapat@gmu.edu](mailto:kpapat@gmu.edu)*

## Bacteria Adhesion

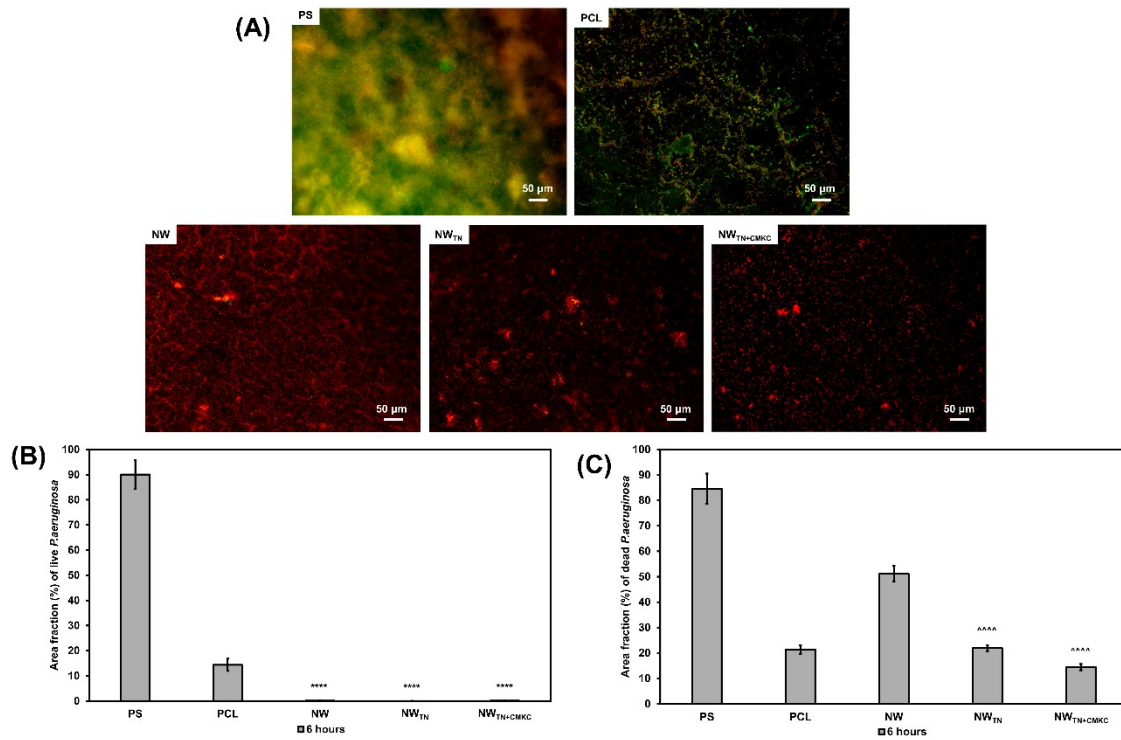

**Fig. S1:** (A) Representative fluorescence microscopic images of surfaces after 6 hours of incubation with *P. aeruginosa*. The graphs represent the percentage of the area fraction of different surfaces covered by (B) live and (C) dead *P. aeruginosa* bacteria after 6 hours of incubation. \*\*\*\* represent  $p$ -value  $<0.0001$  when compared to PCL control and ^^^ represent  $p$ -value  $<0.0001$  when compared to NW.

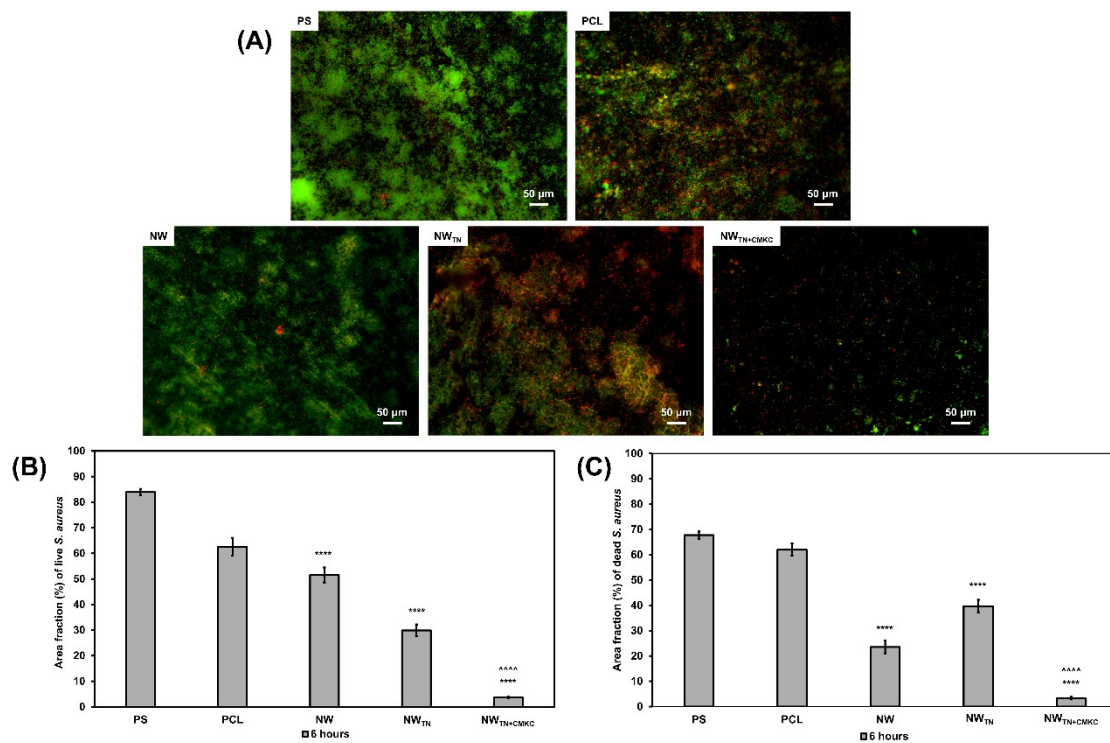

**Fig. S2:** (A) Representative fluorescence microscopic images of surfaces after 6 hours of incubation with *S. aureus*. The graphs represent the percentage of the area fraction of different surfaces covered by (B) live and (C) dead *S. aureus* bacteria after 6 hours of incubation. \*\*\*\* represent  $p$ -value < 0.0001 when compared to PCL control and ^^^^ represent  $p$ -value < 0.0001 when compared to NW<sub>TN</sub>.

## Bacteria Morphology

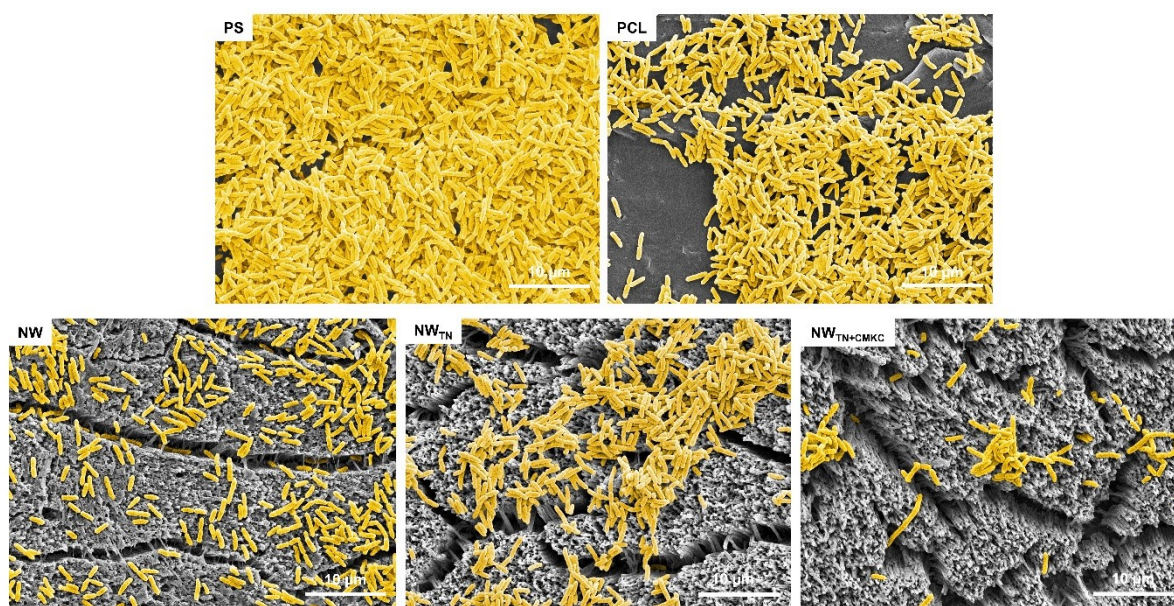

**Fig. S3:** Representative SEM images of bacteria morphology after 6 hours of *P. aeruginosa* incubation captured at 2500x magnification.



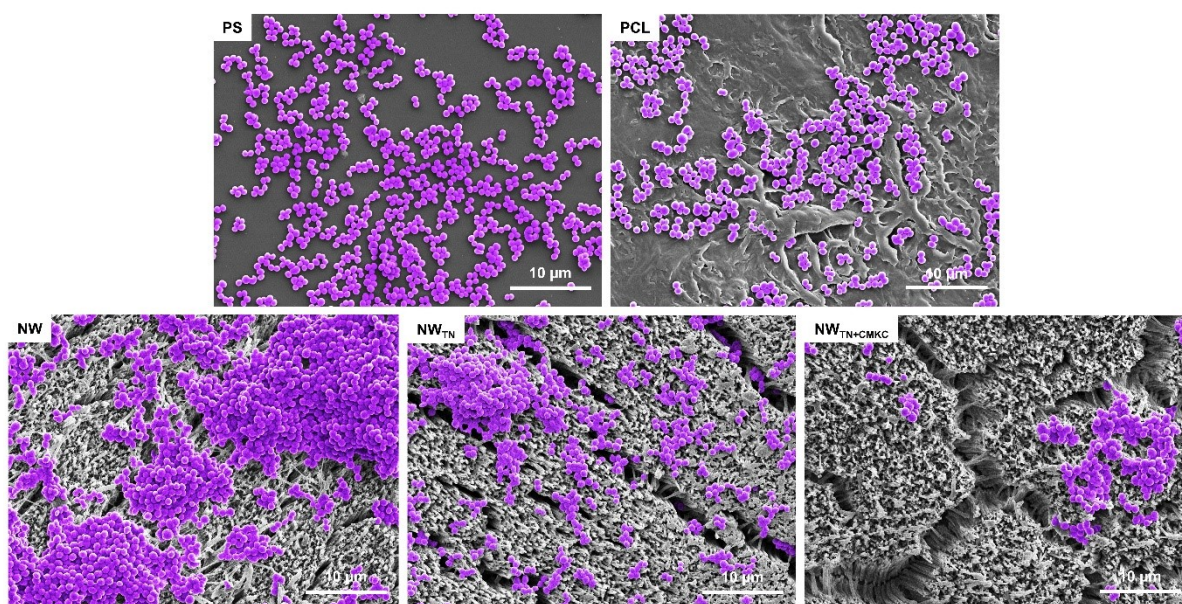

**Fig. S4:** Representative SEM images of bacteria morphology after 6 hours of *S. aureus* incubation captured at 2500x magnification.

## Erythrocyte Adhesion on Different Surfaces

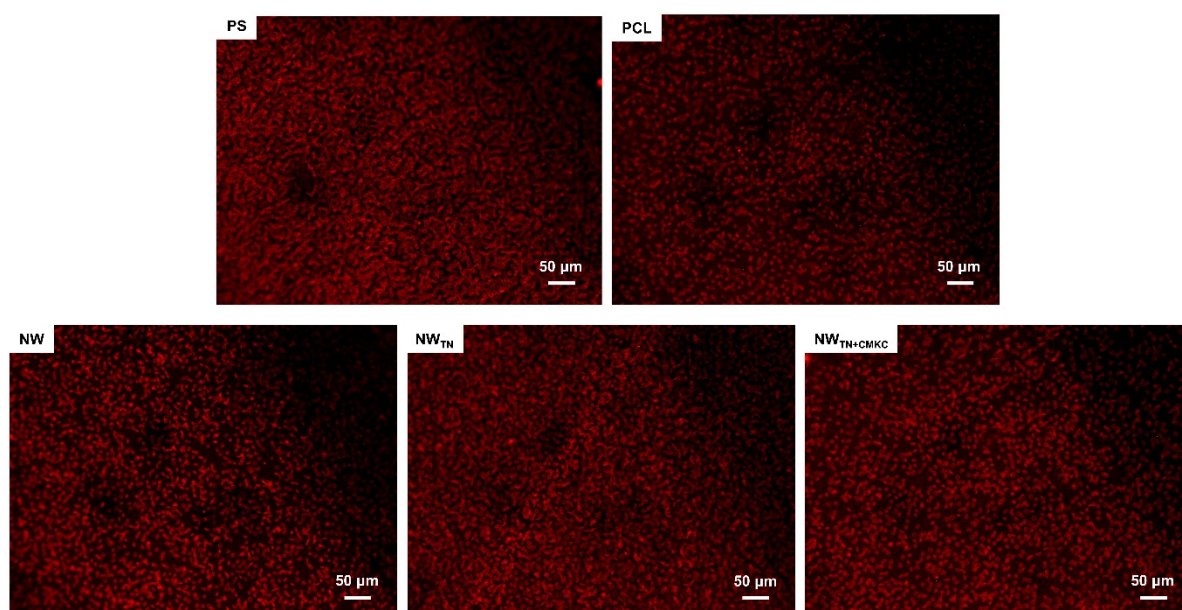

**Fig. S5:** Representative fluorescence microscopic images of adhered erythrocyte cells on surfaces after 1.5 hours of incubation.

## Erythrocyte Morphology on Different Surfaces

After a 1.5-hour incubation period, PS had mostly stage 1 and stage 2 echinocytes on its surfaces. Compared to PS, PCL control surfaces had less echinocytes or other abnormal morphological changes after the 1.5-hour incubation period (Fig. S6A). Data from Fig. S6B also shows that PCL surfaces had around 40% of cell change, while it was almost 97% for PS surfaces. Results from Fig. S6B indicate that NW<sub>TN</sub> and NW<sub>TN+CMKC</sub> surfaces had just 19.5% and 25.07% of cell change respectively after 1.5 hours of incubation.

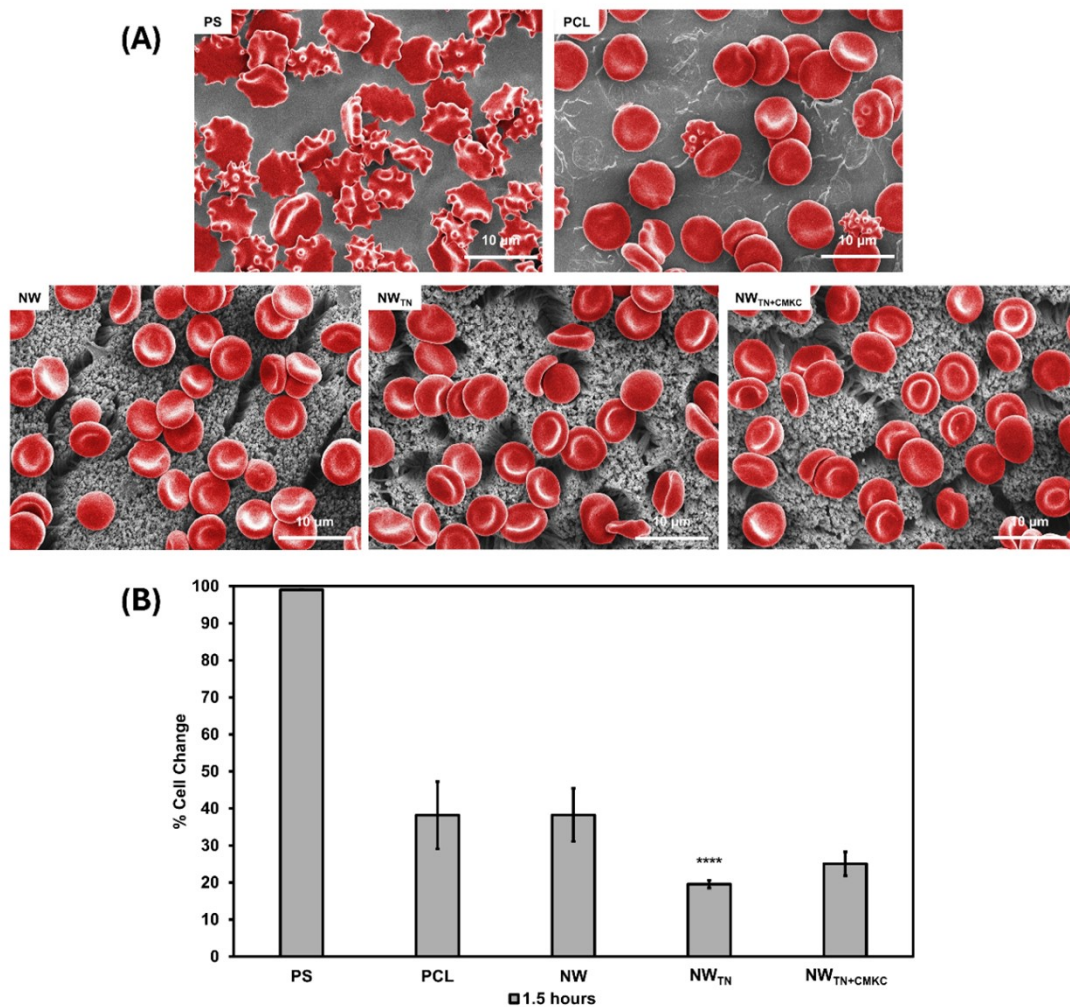

**Fig. S6: (A)** Representative SEM images depicting erythrocyte cells morphological changes on surfaces after 1.5 hours of incubation (2500x magnification. **(B)** Percentage of morphological changes in erythrocytes on different surfaces after 1.5 hours of incubation, characterized from SEM images. Error bars represent standard deviation. \*\*\*\* represent *p*-value <0.0001 when compared to PCL control.

### NW size-distribution histograms

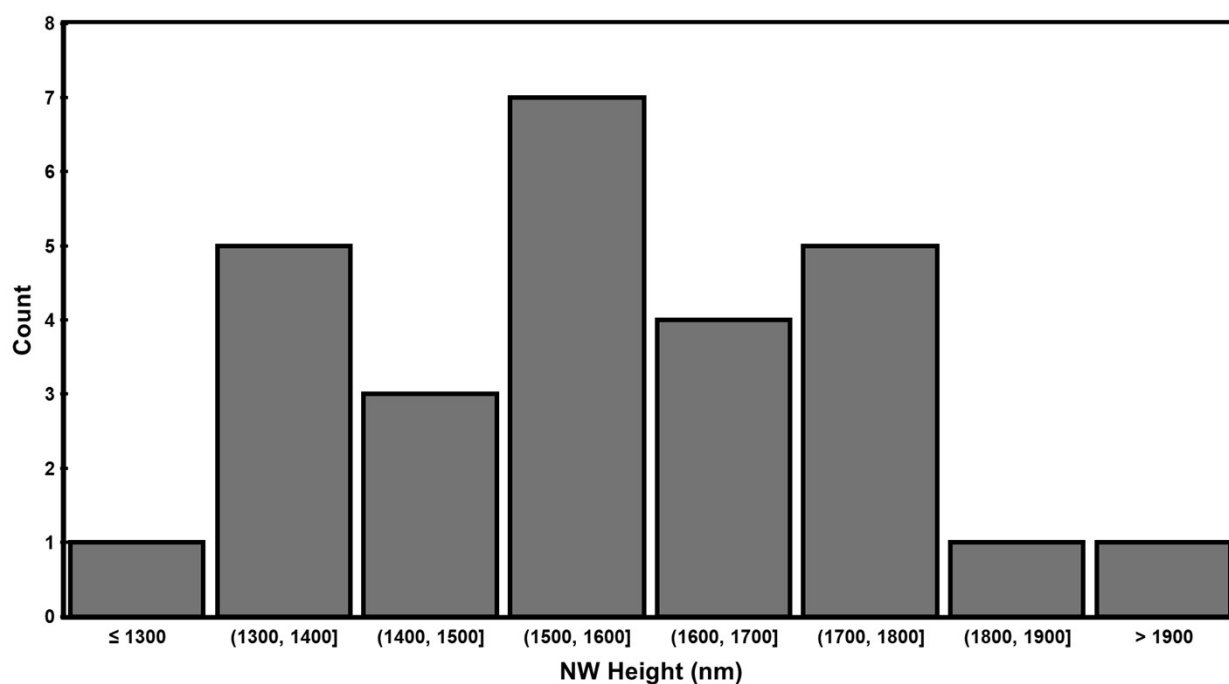

**Fig S7:** Histogram of PCL NW heights ( $n = 27$ ) measured from SEM images using ImageJ. Bins are 100-nm intervals (labels indicate inclusive ranges at the right bound). The distribution centers at  $1577.7 \pm 170.5$  nm (mean  $\pm$  SD), indicating good uniformity of the fabricated nanowires across fields of view.



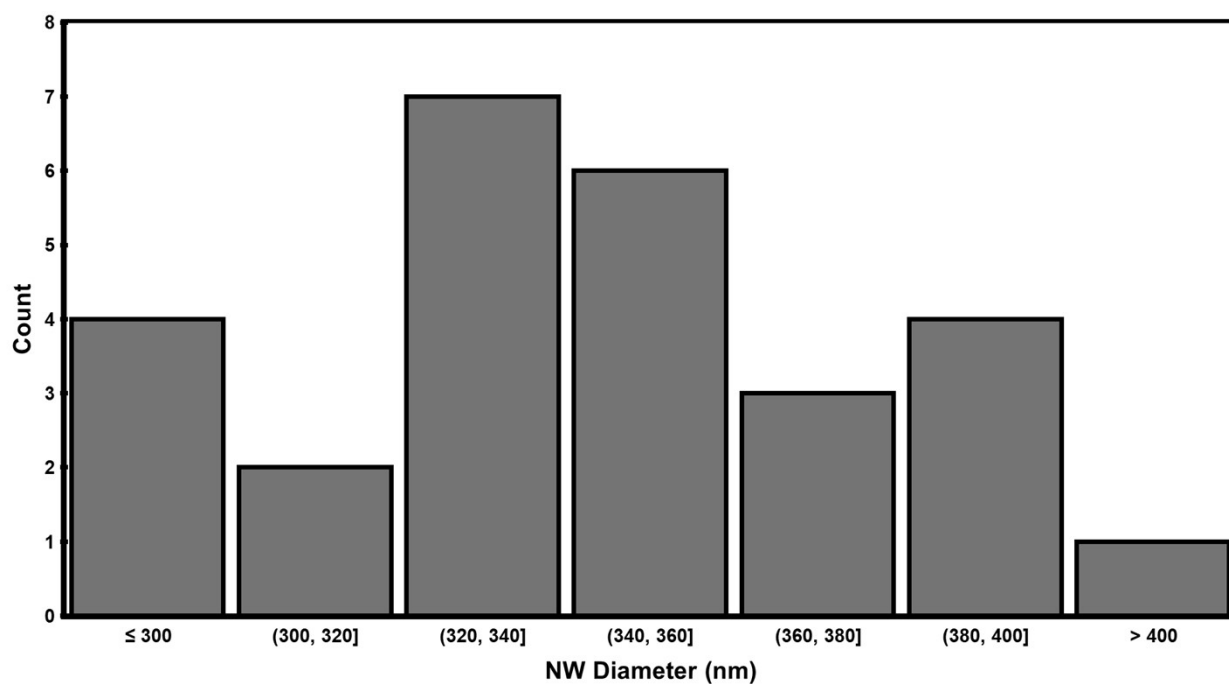

**Fig. S8:** Histogram of PCL NW diameters ( $n = 27$ ) measured from SEM images using ImageJ. Bins are 20-nm intervals (labels indicate inclusive ranges at the right bound). The distribution centers at  $341.4 \pm 32.0$  nm (mean  $\pm$  SD), consistent with the targeted diameter obtained from the AAO-templating process.
